# Supplementary material for: Efficient ternary bulk heterojunction solar cells based on small molecules only
Source: Royal Society of Chemistry journal article supplement (doi:10.1039/c5ta00592b), 2015-01-01
Supplement: c5ta00592b1.pdf [file c5ta00592b1.pdf]

## Electronic Supplementary Information

### Efficient Ternary Bulk Heterojunction Solar Cells Based on Small Molecules Only

Tzu-Yen Huang<sup>a,b</sup>, Dhananjaya Patra<sup>b</sup>, Yu-Sheng Hsiao<sup>c</sup>, Sheng Hsiung Chang<sup>d</sup>,  
Chun-Guey Wu<sup>d</sup>, Kuo-Chuan Ho<sup>a,e,\*</sup>, Chih-Wei Chu<sup>b,\*</sup>

<sup>a</sup> Department of Chemical Engineering, National Taiwan University, Taipei, Taiwan (R.O.C.) 10617

<sup>b</sup> Research Center for Applied Sciences, Academia Sinica, Taipei, Taiwan (R.O.C.) 11529

<sup>c</sup> Department of Materials Engineering, Mingchi University of Technology, New Taipei City, Taiwan (R.O.C.) 24301

<sup>d</sup> Research Center for New Generation Photovoltaics, Jhongli City, Taiwan (R.O.C.) 32001

<sup>e</sup> Institute of Polymer Science and Engineering, National Taiwan University, Taipei, Taiwan (R.O.C.) 10617

\*Corresponding authors. E-mail: kcho@ntu.edu.tw (K.-C.H.); gchu@gate.sinica.edu.tw (C.-W.C.). Telephone: +886-2-23660739 (K.-C.H.); +886-2-27187523 (C.-W.C.). Fax: +886-2-23623040 (K.-C.H.); +886-2-27873122 (C.-W.C.).

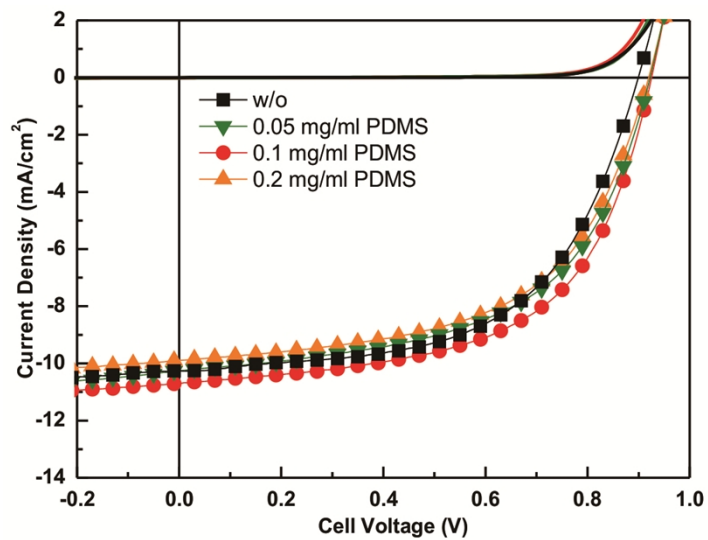

Fig. S1  $J$ - $V$  curves of BDT6T:PC<sub>71</sub>BM films incorporating various concentrations of PDMS.

Table. S1 Device performance characteristics of BDT6T:PC<sub>71</sub>BM films incorporating various concentrations of PDMS.

| BDT6T:PC <sub>71</sub> BM     | $V_{OC}$ (V) | $J_{SC}$ (mA cm <sup>-2</sup> ) | FF   | PCE (%) |
|-------------------------------|--------------|---------------------------------|------|---------|
| w/o                           | 0.89         | 10.30                           | 0.56 | 5.13    |
| 0.05 mg mL <sup>-1</sup> PDMS | 0.92         | 10.30                           | 0.56 | 5.30    |
| 0.1 mg mL <sup>-1</sup> PDMS  | 0.92         | 10.70                           | 0.57 | 5.61    |
| 0.2 mg mL <sup>-1</sup> PDMS  | 0.91         | 9.89                            | 0.56 | 5.03    |

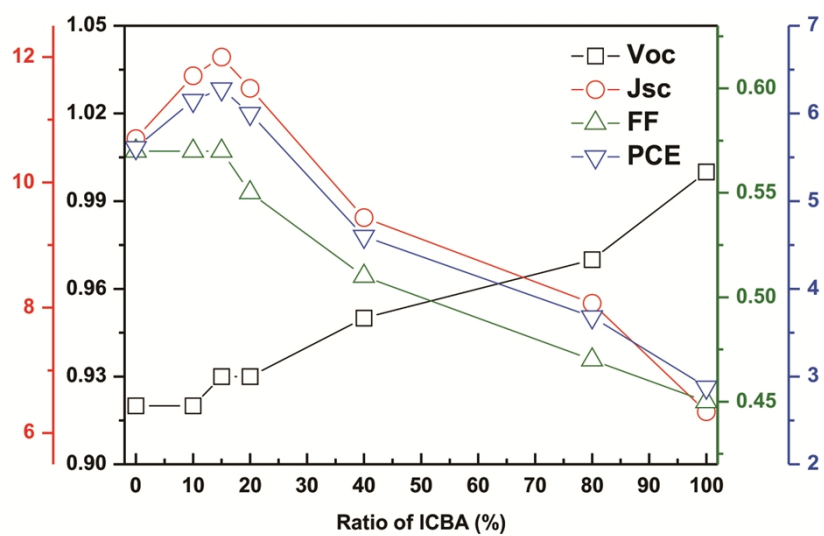

Fig. S2 Values of  $V_{OC}$ ,  $J_{SC}$ , FF, and PCE for devices incorporating different weight ratios of ICBA in the fullerene.

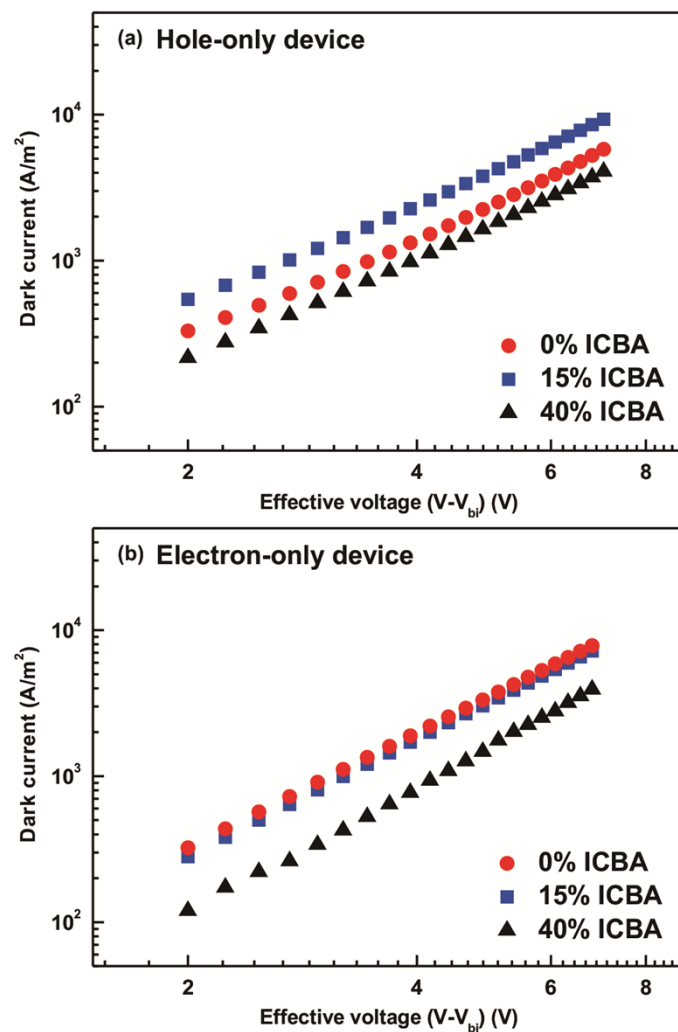

Fig. S3 Measured  $J$ - $V$  characteristics under the dark for (a) hole and (b) electron-only devices of BDT6T:ICBA:PC<sub>71</sub>BM films incorporating 0, 15, and 40% ICBA in the fullerene.
